# Supplementary material for: Evaluation of different culture media to support in vitro growth and biofilm formation of bacterial vaginosis-associated anaerobes
Source: PeerJ. 2020 Sep 10;8:e9917. doi: 10.7717/peerj.9917 (PMC7487148; doi:10.7717/peerj.9917)
Supplement: Supplemental Information 5 [file peerj-08-9917-s005.xlsx]

## Sheet: BHV
Culture medium Brucella broth supplemented with hemin and vitamin K1 (BHV)
	Optical density (620 nm)								Growth ratio T48h/T0h
Assay 1	Gardnerella sp.	A. vaginae	L. iners	M. curtisii	P. anaerobius	P. bivia			Gardnerella sp.	A. vaginae	L. iners	M. curtisii	P. anaerobius	P. bivia
T0h	0.109	0.105	0.075	0.081	0.08	0.122		Assay 1	1.07339	0.92381	1.04	1.02469	3.85	1.36885
T48h	0.117	0.097	0.078	0.083	0.308	0.167		Assay 2	1.07	0.86	1.42647	1.2	2.48	0.98
Assay 2								Assay 3	1.01754	0.580645	1.1	1.01136	3.63291	2.11864
T0h	0.081	0.071	0.068	0.095	0.104	0.072		Assay 4						1.13861
T48h	0.08667	0.06106	0.097	0.114	0.25792	0.07056		Assay 5
Assay 3
T0h	0.114	0.093	0.095	0.088	0.079	0.118
T48h	0.116	0.054	0.1045	0.089	0.287	0.25
Assay 4
T0h						0.101
T48h						0.115
Assay 5
T0h
T48h

## Sheet: BHV.Aa
Culture medium Brucella broth supplemented with hemin, vitamin K1, and ascorbic acid (BHV.Aa)
	Optical density (620 nm)								Growth ratio T48h/T0h
Assay 1	Gardnerella sp.	A. vaginae	L. iners	M. curtisii	P. anaerobius	P. bivia			Gardnerella sp.	A. vaginae	L. iners	M. curtisii	P. anaerobius	P. bivia
T0h	0.107	0.087	0.095	0.079	0.081	0.122		Assay 1	0.962617	1.14943	0.884211	0.708861	1.02469	2.13115
T48h	0.103	0.1	0.084	0.056	0.083	0.26		Assay 2	1.125	1.07407	1.22727	1.13542	1.18182	4.42857
Assay 2								Assay 3	1.14444	1.05155	1.5625	1.16304	2.67568	4.01136
T0h	0.096	0.081	0.066	0.096	0.088	0.07		Assay 4					2.68578	2.09868
T48h	0.108	0.087	0.081	0.109	0.104	0.31		Assay 5					2.23148	3.45455
Assay 3
T0h	0.09	0.097	0.096	0.092	0.111	0.088
T48h	0.103	0.102	0.15	0.107	0.297	0.353
Assay 4
T0h					0.109	0.076
T48h					0.29275	0.1595
Assay 5
T0h					0.108	0.077
T48h					0.241	0.266

## Sheet: NYC
Culture medium New York City III broth supplemented with horse serum (NYC)
	Optical density (620 nm)								Growth ratio T48h/T0h
Assay 1	Gardnerella sp.	A. vaginae	L. iners	M. curtisii	P. anaerobius	P. bivia			Gardnerella sp.	A. vaginae	L. iners	M. curtisii	P. anaerobius	P. bivia
T0h	0.076	0.068	0.074	0.101	0.09	0.123		Assay 1	12.6842	13.2794	12.6622	1.43564	10.8444	6.99187
T48h	0.964	0.903	0.937	0.145	0.976	0.86		Assay 2	9.40206	9.14563	8.23762	1.37805	7.58252	8.05556
Assay 2								Assay 3	7.78182	8.69903	9.21359	1.25893	7.42157	5.07692
T0h	0.097	0.103	0.101	0.082	0.103	0.108		Assay 4	9.37647	10.6267	9.66071	1.48936	9.45556
T48h	0.912	0.942	0.832	0.113	0.781	0.87		Assay 5
Assay 3
T0h	0.11	0.103	0.103	0.112	0.102	0.13
T48h	0.856	0.896	0.949	0.141	0.757	0.66
Assay 4
T0h	0.085	0.075	0.112	0.094	0.09
T48h	0.797	0.797	1.082	0.14	0.851
Assay 5
T0h
T48h

## Sheet: NYC.Aa
Culture medium New York City III broth supplemented with horse serum and ascorbic acid (NYC.Aa)
	Optical density (620 nm)								Growth ratio T48h/T0h
Assay 1	Gardnerella sp.	A. vaginae	L. iners	M. curtisii	P. anaerobius	P. bivia			Gardnerella sp.	A. vaginae	L. iners	M. curtisii	P. anaerobius	P. bivia
T0h	0.114	0.1	0.084	0.104	0.09	0.127		Assay 1	6.95614	8.37	11.3095	1.03846	6.9	5.69291
T48h	0.793	0.837	0.95	0.108	0.621	0.723		Assay 2	7.82796	9.69892	10.3441	1.61538	5.95726	6.03636
Assay 2								Assay 3	8.05556	8.32	9.89109	1.56383	7.5618	3.88696
T0h	0.093	0.093	0.093	0.091	0.117	0.11		Assay 4
T48h	0.728	0.902	0.962	0.147	0.697	0.664		Assay 5
Assay 3
T0h	0.09	0.1	0.101	0.094	0.089	0.115
T48h	0.725	0.832	0.999	0.147	0.673	0.447
Assay 4
T0h
T48h
Assay 5
T0h
T48h

## Sheet: SB
Culture medium Schaedler broth (SB)
	Optical density (620 nm)								Growth ratio T48h/T0h
Assay 1	Gardnerella sp.	A. vaginae	L. iners	M. curtisii	P. anaerobius	P. bivia			Gardnerella sp.	A. vaginae	L. iners	M. curtisii	P. anaerobius	P. bivia
T0h	0.1	0.112	0.105	0.101	0.108	0.088		Assay 1	1.045	1.16071	0.7	1.17327	10.1157	0.761364
T48h	0.1045	0.13	0.0735	0.1185	1.0925	0.067		Assay 2	0.697479	0.895	0.97479	1.24528	10.3652	0.825
Assay 2								Assay 3	1.01818	1.02	0.852941	1.06393	11.55	1
T0h	0.119	0.1	0.119	0.106	0.115	0.08		Assay 4
T48h	0.083	0.0895	0.116	0.132	1.192	0.066		Assay 5
Assay 3
T0h	0.11	0.098	0.119	0.1095	0.097	0.091
T48h	0.112	0.09996	0.1015	0.1165	1.12035	0.091
Assay 4
T0h
T48h
Assay 5
T0h
T48h

## Sheet: SB.Aa
Culture medium Schaedler broth supplemented with ascorbic acid (SB.Aa)
	Optical density (620 nm)								Growth ratio T48h/T0h
Assay 1	Gardnerella sp.	A. vaginae	L. iners	M. curtisii	P. anaerobius	P. bivia			Gardnerella sp.	A. vaginae	L. iners	M. curtisii	P. anaerobius	P. bivia
T0h	0.096	0.104	0.07	0.09	0.104	0.123		Assay 1	1.02083	1.10577	0.842857	1.23333	10.7043	5.58537
T48h	0.098	0.115	0.059	0.111	1.11325	0.687		Assay 2	1.36111	0.881188	0.545045	1.44444	10.7264	6.21212
Assay 2								Assay 3	1.21	1.01	0.964602	1.5	11.05	5.92
T0h	0.108	0.101	0.111	0.117	0.106	0.099		Assay 4
T48h	0.147	0.089	0.0605	0.169	1.137	0.615		Assay 5
Assay 3
T0h	0.11	0.98	0.113	0.101	0.102	0.118
T48h	0.1331	0.9898	0.109	0.1515	1.1271	0.69856
Assay 4
T0h
T48h
Assay 5
T0h
T48h

## Sheet: sBHI
Culture medium Brain Heart Infusion broth supplemented with gelatine, starch, and yeast extract (sBHI)
	Optical density (620 nm)								Growth ratio T48h/T0h
Assay 1	Gardnerella sp.	A. vaginae	L. iners	M. curtisii	P. anaerobius	P. bivia			Gardnerella sp.	A. vaginae	L. iners	M. curtisii	P. anaerobius	P. bivia
T0h	0.074	0.12	0.019	0.028	0.118	0.112		Assay 1	0.722973	1.08333	0.736842	1.21429	4.55085	3.40179
T48h	0.0535	0.13	0.014	0.034	0.537	0.381		Assay 2	1.51562	0.904762	0.980198	1.27619	4.9505	4.50943
Assay 2								Assay 3	1.04211	1.075	0.899083	1.22927	5.01786	5.7451
T0h	0.128	0.105	0.101	0.105	0.101	0.053		Assay 4	1.09314				6.9125
T48h	0.194	0.095	0.099	0.134	0.5	0.239		Assay 5
Assay 3
T0h	0.095	0.1	0.109	0.1025	0.112	0.102
T48h	0.099	0.1075	0.098	0.126	0.562	0.586
Assay 4
T0h	0.102				0.08
T48h	0.1115				0.553
Assay 5
T0h
T48h

## Sheet: sBHI.Aa
Culture medium Brain Heart Infusion broth supplemented with gelatine, starch, yeast extract, and ascorbic acid (sBHI.Aa)
	Optical density (620 nm)								Growth ratio T48h/T0h
Assay 1	Gardnerella sp.	A. vaginae	L. iners	M. curtisii	P. anaerobius	P. bivia			Gardnerella sp.	A. vaginae	L. iners	M. curtisii	P. anaerobius	P. bivia
T0h	0.09	0.054	0.1	0.009	0.097	0.094		Assay 1	2.61111	0.759259	1.46	2.11111	5.3866	8.33
T48h	0.235	0.041	0.146	0.019	0.5225	0.78302		Assay 2	1.5	1.26	1.16505	1.38	4.93	6.50575
Assay 2								Assay 3	2.14	0.98	1.28	1.22222	5.11	7.44898
T0h	0.109	0.067	0.103	0.103	0.1	0.087		Assay 4
T48h	0.1635	0.08442	0.12	0.14214	0.493	0.566		Assay 5
Assay 3
T0h	0.092	0.086	0.098	0.09	0.12	0.098
T48h	0.19688	0.08428	0.12544	0.11	0.6132	0.73
Assay 4
T0h
T48h
Assay 5
T0h
T48h

## Sheet: mGTS
Culture medium simulating the genital tract secretions (mGTS)
	Optical density (620 nm)								Growth ratio T48h/T0h
Assay 1	Gardnerella sp.	A. vaginae	L. iners	M. curtisii	P. anaerobius	P. bivia			Gardnerella sp.	A. vaginae	L. iners	M. curtisii	P. anaerobius	P. bivia
T0h	0.0965	0.1	0.067	0.086	0.102	0.096		Assay 1	1.53368	1.1175	1.16045	1.0843	1.44853	2.04688
T48h	0.148	0.11175	0.07775	0.09325	0.14775	0.1965		Assay 2	1.62385	1.18317	1.11538	0.852198	1.19151	1.58478
Assay 2								Assay 3	1.67	1.21	1.18	0.833333	1.19	1.54
T0h	0.109	0.101	0.104	0.091	0.106	0.092		Assay 4
T48h	0.177	0.1195	0.116	0.07755	0.1263	0.1458		Assay 5
Assay 3
T0h	0.109	0.094	0.076	0.042	0.108	0.099
T48h	0.18203	0.11374	0.08968	0.035	0.12852	0.15246
Assay 4
T0h
T48h
Assay 5
T0h
T48h
