# Supplementary material for: Evaluation of different culture media to support in vitro growth and biofilm formation of bacterial vaginosis-associated anaerobes
Source: PeerJ. 2020 Sep 10;8:e9917. doi: 10.7717/peerj.9917 (PMC7487148; doi:10.7717/peerj.9917)
Supplement: Supplemental Information 6 [file peerj-08-9917-s006.xlsx]

## Sheet: BHV
Culture medium Brucella broth supplemented with hemin and vitamin K1 (BHV)
	Optical density (595 nm)
	Gardnerella sp.	A. vaginae	L. iners	M. curtisii	P. anaerobius	P. bivia
Assay 1	0.001	0.01	0.16	0.001	0.259	0.02
Assay 2	0.552	0.001	0.054	0.001	0.165	0.622
Assay 3	0.026	0.005	0.062	0.002	0.198	0.878
Assay 4	0.252					0.416

## Sheet: BHV.Aa
Culture medium Brucella broth supplemented with hemin, vitamin K1, and ascorbic acid (BHV.Aa)
	Optical density (595 nm)
	Gardnerella sp.	A. vaginae	L. iners	M. curtisii	P. anaerobius	P. bivia
Assay 1	0.108	0.014	0.04	0.007	0.1	0.342
Assay 2	0.001	0.004	0.002	0.001	0.01	0.091
Assay 3	0.052	0.027	0.031	0.002	0.057	0.094
Assay 4	0.071	0.07	0.162	0.051	0.112	0.13

## Sheet: NYC
Culture medium New York City III broth supplemented with horse serum (NYC)
	Optical density (595 nm)
	Gardnerella sp.	A. vaginae	L. iners	M. curtisii	P. anaerobius	P. bivia
Assay 1	0.999	0.964	0.884	0.87	0.738	1.177
Assay 2	1.077	1.201	0.53	0.722	0.931	1.129
Assay 3	1.031	1.149	0.842	0.641	1.376	1.126
Assay 4	0.888	0.993	0.724	0.329	0.581	0.969

## Sheet: NYC.Aa
Culture medium New York City III broth supplemented with horse serum and ascorbic acid (NYC.Aa)
	Optical density (595 nm)
	Gardnerella sp.	A. vaginae	L. iners	M. curtisii	P. anaerobius	P. bivia
Assay 1	0.121	0.013	0.01	0.001	0.525	0.128
Assay 2	0.872	0.052	0.028	0.005	0.733	0.155
Assay 3	1.016	0.023	0.124	0.011	0.777	0.702
Assay 4

## Sheet: SB
Culture medium Schaedler broth (SB)
	Optical density (595 nm)
	Gardnerella sp.	A. vaginae	L. iners	M. curtisii	P. anaerobius	P. bivia
Assay 1	1.328	0.006	0.092	0.083	1.046	0.683
Assay 2	1.171	0.001	0.123	0.025	0.935	1.401
Assay 3	1.482	0.04	0.138	0.044	1.342	1.559
Assay 4	1.446	0.046	0.191	0.101	1.153	1.496

## Sheet: SB.Aa
Culture medium Schaedler broth supplemented with ascorbic acid (SB.Aa)
	Optical density (595 nm)
	Gardnerella sp.	A. vaginae	L. iners	M. curtisii	P. anaerobius	P. bivia
Assay 1	1.218	0.034	0.04	0.019	0.751	1.304
Assay 2	1.299	0.077	0.055	0.011	0.643	1.199
Assay 3	1.33	0.064	0.034	0.017	0.599	1.208
Assay 4

## Sheet: sBHI
Culture medium Brain Heart Infusion broth supplemented with gelatine, starch, and yeast extract (sBHI)
	Optical density (595 nm)
	Gardnerella sp.	A. vaginae	L. iners	M. curtisii	P. anaerobius	P. bivia
Assay 1	1.004	0.06	0.186	0.046	1.252	0.435
Assay 2	1.14	0.049	0.069	0.059	1.035	0.215
Assay 3	0.987	0.071	0.154	0.066	1.113	0.331
Assay 4

## Sheet: sBHI.Aa
Culture medium Brain Heart Infusion broth supplemented with gelatine, starch, yeast extract, and ascorbic acid (sBHI.Aa)
	Optical density (595 nm)
	Gardnerella sp.	A. vaginae	L. iners	M. curtisii	P. anaerobius	P. bivia
Assay 1	1.139	0.106	0.147	0.094	0.823	1.354
Assay 2	1.192	0.139	0.116	0.117	0.533	0.765
Assay 3	1.007	0.128	0.133	0.114	0.654	0.792
Assay 4

## Sheet: mGTS
Culture medium simulating the genital tract secretions (mGTS)
	Optical density (595 nm)
	Gardnerella sp.	A. vaginae	L. iners	M. curtisii	P. anaerobius	P. bivia
Assay 1	0.8748	0.069	0.048	0.014	0.598	0.272
Assay 2	0.9769	0.084	0.134	0.021	0.783	0.204
Assay 3	0.901	0.072	0.072	0.031	0.701	0.261
Assay 4
