# Supplementary material for: Evaluation of different culture media to support in vitro growth and biofilm formation of bacterial vaginosis-associated anaerobes
Source: PeerJ. 2020 Sep 10;8:e9917. doi: 10.7717/peerj.9917 (PMC7487148; doi:10.7717/peerj.9917)
Supplement: Supplemental Information 7 [file peerj-08-9917-s007.xlsx]

## Sheet: NYC (with peptone no. 3)
Culture medium New York City III broth supplemented with horse serum (NYC)
	Optical density (595 nm)
	Gardnerella sp.	A. vaginae	L. iners	M. curtisii	P. anaerobius	P. bivia
Assay 1	1.351	1.378	0.468	0.489	0.572	1.225
Assay 2	1.512	1.539	0.839	0.351	0.635	1.247
Assay 3	1.109	1.204	0.791	0.347	0.592	1.299

## Sheet: NYC (with peptone from meat)
Culture medium New York City III broth with peptone from meat and supplemented with horse serum
	Optical density (595 nm)
	Gardnerella sp.	A. vaginae	L. iners	M. curtisii	P. anaerobius	P. bivia
Assay 1	0.948	1.023	0.925	0.113	0.578	1.223
Assay 2	1.389	1.079	0.955	0.191	0.67	1.506
Assay 3	0.538	1.128	0.54	0.139	0.731	0.643
