# Supplementary material for: Evaluation of different culture media to support in vitro growth and biofilm formation of bacterial vaginosis-associated anaerobes
Source: PeerJ. 2020 Sep 10;8:e9917. doi: 10.7717/peerj.9917 (PMC7487148; doi:10.7717/peerj.9917)
Supplement: Supplemental Information 8 [file peerj-08-9917-s008.xlsx]

## Sheet: NYC
Culture medium New York City III broth supplemented with horse serum (NYC)
	Optical density (595 nm)
	G. piotii UM035	G. leopoldii UGent 09.48	G. vaginalis UM121	G. swidsinskii GS 9838-1ᵀ
Assay 1	1.15	0.874	1.186	1.353
Assay 2	1.067	0.925	1.212	1.342
Assay 3	1.074	0.77	1.162	1.42

## Sheet: sBHI
Culture medium Brain Heart Infusion broth supplemented with gelatine, starch, and yeast extract (sBHI)
	Optical density (595 nm)
	G. piotii UM035	G. leopoldii UGent 09.48	G. vaginalis UM121	G. swidsinskii GS 9838-1ᵀ
Assay 1	1.032	1.004	1.119	1.101
Assay 2	1.148	1.136	1.183	1.196
Assay 3	1.134	1.235	1.224	1.262
